# Supplementary material for: Revealing the Phenolic Acids in Cardamine violifolia Leaves by Transcriptome and Metabolome Analyses
Source: MDPI journal article supplement (doi:10.3390/metabo12111024), 2022-10-26
Supplement: s1 [file s1]

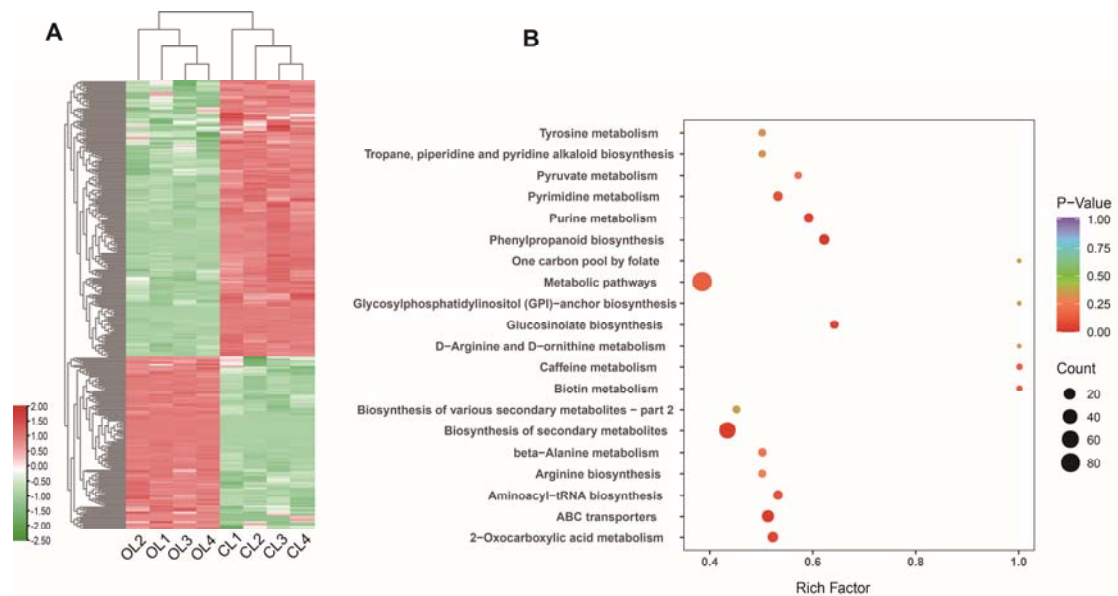

Figure S1 Heatmap (A) and KEGG enrichment (B) analysis of the differentially regulated metabolites
