# Supplementary figures and images for: Revealing the Phenolic Acids in Cardamine violifolia Leaves by Transcriptome and Metabolome Analyses
Source: MDPI journal article supplement (doi:10.3390/metabo12111024), 2022-10-26

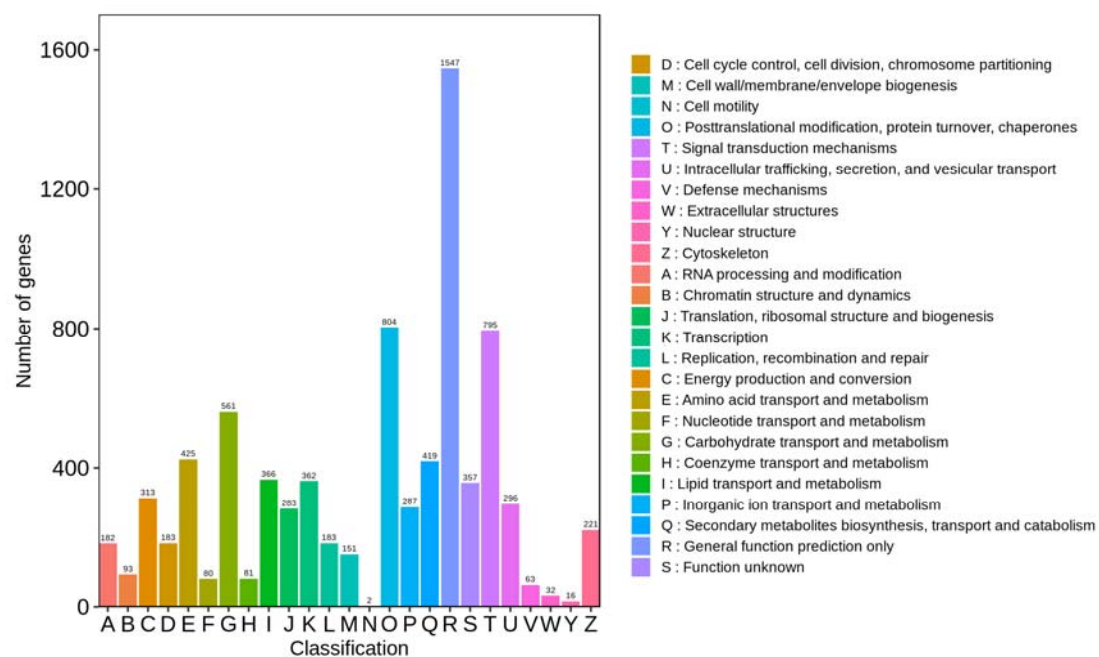

Figure S3 KOG classification of the differentially expressed genes.

Supplement: s1 [file s1]

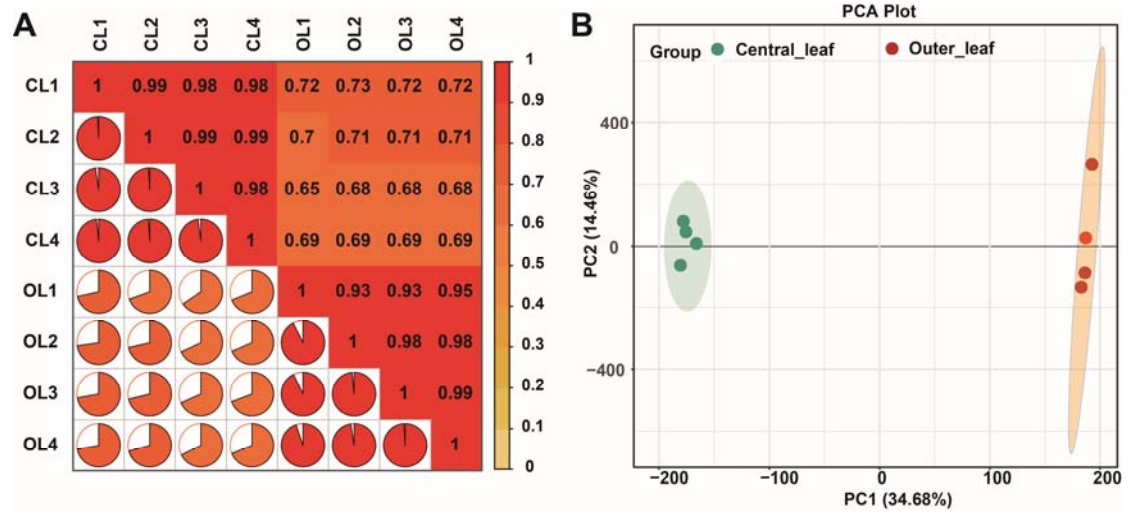

Figure S2 Correlation (A) and principal component (B) analyses between the samples

Supplement: s1 [file s1]
